# Supplementary material for: Dilution and photooxidation driven processes explain the evolution of organic aerosol in wildfire plumes
Source: Royal Society of Chemistry journal article supplement (doi:10.1039/d1ea00082a), 2022-01-01
Supplement: d1ea00082a1.pdf [file d1ea00082a1.pdf]

## Supporting Information: Dilution and Photooxidation Driven Processes Explain the Evolution of Organic Aerosol in Wildfire Plumes

Ali Akherati<sup>1^</sup>, Yicong He<sup>1</sup>, Lauren A. Garofalo<sup>2</sup>, Anna L. Hodshire<sup>2</sup>, Delphine K. Farmer<sup>2</sup>, Sonia M. Kreidenweis<sup>3</sup>, Wade Permar<sup>4</sup>, Lu Hu<sup>4</sup>, Emily V. Fischer<sup>3</sup>, Coty N. Jen<sup>5</sup>, Allen H. Goldstein<sup>6</sup>, Ezra J. T. Levin<sup>3</sup>, Paul J DeMott<sup>3</sup>, Teresa L. Campos<sup>7</sup>, Frank Flocke<sup>7</sup>, John M. Reeves<sup>7</sup>, Darin W. Toohey<sup>8</sup>, Jeffrey R. Pierce<sup>3\*</sup>, and Shantanu H. Jathar<sup>1\*</sup>

<sup>1</sup>Department of Mechanical Engineering, Colorado State University, Fort Collins, CO, USA

<sup>2</sup>Department of Chemistry, Colorado State University, Fort Collins, CO, USA

<sup>3</sup>Department of Atmospheric Science, Colorado State University, Fort Collins, CO, USA

<sup>4</sup>Department of Chemistry and Biochemistry, University of Montana, Missoula, MT, USA

<sup>5</sup>Department of Chemical Engineering, Carnegie Mellon University, Pittsburgh, PA, USA

<sup>6</sup>Department of of Environmental Science, Policy & Management, University of California Berkeley, Berkeley, CA, USA

<sup>7</sup>Earth Observing Laboratory, National Center for Atmospheric Research, Boulder, CO, USA

<sup>8</sup>Department of Atmospheric and Oceanic Science, University of Colorado Boulder, Boulder, CO, USA

\*Correspondence to: Shantanu H. Jathar ([shantanu.jathar@colostate.edu](mailto:shantanu.jathar@colostate.edu)) and Jeffrey R. Pierce

([jeffrey.pierce@colostate.edu](mailto:jeffrey.pierce@colostate.edu))

<sup>^</sup>Now at the Department of Civil and Environmental Engineering, University of California Davis, Davis, CA, USA

*Table S1: Precursor classes, surrogates, and parameters used in this work.*

| <i>Precursor Class</i>                                 | <i>VOC Surrogate</i>         | <i><math>\Delta LVP</math></i> | <i><math>m_{frag}</math></i> | <i><math>p_{10}</math></i> | <i><math>p_{20}</math></i> | <i><math>p_{30}</math></i> | <i><math>p_{40}</math></i> | <i>Reference</i>      |
|--------------------------------------------------------|------------------------------|--------------------------------|------------------------------|----------------------------|----------------------------|----------------------------|----------------------------|-----------------------|
| SVOCs                                                  | naphthalene                  | 1.4922                         | 0.7673                       | 0.8138                     | 0.0072                     | 0.0635                     | 0.1155                     | Zhang et al. (2014)   |
| Linear alkanes                                         | <i>n</i> -dodecane           | 1.4629                         | 0.2627                       | 0.9657                     | 0.0010                     | 0.0020                     | 0.0314                     | Loza et al. (2014)    |
| Benzene <sup>&amp;</sup>                               | benzene                      | 1.5495                         | 0.7895                       | 0.0743                     | 0.0213                     | 0.8963                     | 0.0081                     | Ng et al. (2007)      |
| Toluene <sup>&amp;</sup>                               | toluene                      | 1.4169                         | 1.3064                       | 0.5634                     | 0.3413                     | 0.0016                     | 0.0937                     | Zhang et al. (2014)   |
| C <sub>8+</sub> single-ring aromatics <sup>&amp;</sup> | <i>m</i> -xylene             | 1.4601                         | 0.0736                       | 0.1418                     | 0.2971                     | 0.4571                     | 0.1040                     | Ng et al. (2007)      |
| Multi-ring aromatics                                   | naphthalene                  | 1.4922                         | 0.7673                       | 0.8138                     | 0.0072                     | 0.0635                     | 0.1155                     | Zhang et al. (2014)   |
| Isoprene <sup>^</sup>                                  | isoprene                     | 1.8742                         | 0.5207                       | 0.9924                     | 0.0003                     | 0.0065                     | 0.0009                     | Chhabra et al. (2011) |
| Terpene <sup>^</sup>                                   | $\alpha$ -pinene             | 1.9139                         | 0.1312                       | 0.5991                     | 0.2923                     | 0.1079                     | 0.0007                     | Chhabra et al. (2011) |
| Oxygenated aromatics                                   | phenol, guaiacol             | 2.023                          | 0.315                        | 0.109                      | 0.048                      | 0.439                      | 0.404                      | Yee et al.(2013)      |
| Oxygenated aromatics                                   | syringol                     | 1.629                          | 0.148                        | 0.394                      | 0.121                      | 0.071                      | 0.414                      | Yee et al. (2013)     |
| Heterocyclics                                          | 2-methylfuran, dimethylfuran | 1.459                          | 0.449                        | 0.0005                     | 0.0014                     | 0.998                      | 0.0001                     | He et al. (2020)      |

<sup>&</sup>Together, aromatic hydrocarbons. <sup>^</sup>Together, biogenics.

*Table S2: SOA precursors measured by the PTR-ToF-MS and included in the SOM-TOMAS model. Only the most dominant isomer is listed in the first column.*

| <i>Species name</i>            | <i>Species formula</i>                        | <i>k<sub>OH</sub> [cm<sup>3</sup> molecules<sup>-1</sup> s<sup>-1</sup>]</i> | <i>MW [g mol<sup>-1</sup>]</i> | <i>Surrogate</i>     |
|--------------------------------|-----------------------------------------------|------------------------------------------------------------------------------|--------------------------------|----------------------|
| Pyrrole                        | C <sub>4</sub> H <sub>5</sub> N               | 1.45×10 <sup>-10</sup>                                                       | 67.09                          | Heterocyclics        |
| Furan                          | C <sub>4</sub> H <sub>4</sub> O               | 4.00×10 <sup>-11</sup>                                                       | 68.07                          | Heterocyclics        |
| Isoprene                       | C <sub>5</sub> H <sub>8</sub>                 | 1.00×10 <sup>-10</sup>                                                       | 68.12                          | Biogenics            |
| Dihydropyrrole                 | C <sub>4</sub> H <sub>7</sub> N               | 1.04×10 <sup>-10</sup>                                                       | 69.10                          | Heterocyclics        |
| Tetrahydropyrrole              | C <sub>4</sub> H <sub>9</sub> N               | 7.85×10 <sup>-11</sup>                                                       | 71.12                          | Heterocyclics        |
| Benzene                        | C <sub>6</sub> H <sub>6</sub>                 | 1.22×10 <sup>-12</sup>                                                       | 78.11                          | Reduced Aromatics    |
| Pyridine                       | C <sub>5</sub> H <sub>5</sub> N               | 3.70×10 <sup>-13</sup>                                                       | 79.10                          | Heterocyclics        |
| Methylpyrrole                  | C <sub>5</sub> H <sub>7</sub> N               | 1.10×10 <sup>-10</sup>                                                       | 81.12                          | Heterocyclics        |
| MethylFuran                    | C <sub>5</sub> H <sub>6</sub> O               | 7.80×10 <sup>-11</sup>                                                       | 82.10                          | Heterocyclics        |
| Furanone                       | C <sub>4</sub> H <sub>4</sub> O <sub>2</sub>  | 5.66×10 <sup>-11</sup>                                                       | 84.07                          | Heterocyclics        |
| Toluene                        | C <sub>7</sub> H <sub>8</sub>                 | 5.63×10 <sup>-12</sup>                                                       | 92.14                          | Reduced Aromatics    |
| 2-Furancarbonitrile            | C <sub>5</sub> H <sub>3</sub> NO              | 7.15×10 <sup>-12</sup>                                                       | 93.08                          | Heterocyclics        |
| MethylPyridine                 | C <sub>6</sub> H <sub>7</sub> N               | 1.10×10 <sup>-12</sup>                                                       | 93.13                          | Heterocyclics        |
| Phenol                         | C <sub>6</sub> H <sub>6</sub> O               | 2.80×10 <sup>-11</sup>                                                       | 94.11                          | Oxygenated Aromatics |
| Furfural                       | C <sub>5</sub> H <sub>4</sub> O <sub>2</sub>  | 3.55×10 <sup>-11</sup>                                                       | 96.08                          | Heterocyclics        |
| Dimethylfuran                  | C <sub>6</sub> H <sub>8</sub> O               | 2.00×10 <sup>-10</sup>                                                       | 96.13                          | Heterocyclics        |
| 2-Methanolfuran                | C <sub>5</sub> H <sub>6</sub> O <sub>2</sub>  | 1.04×10 <sup>-10</sup>                                                       | 98.10                          | Heterocyclics        |
| Dihydrofurandione              | C <sub>4</sub> H <sub>4</sub> O <sub>3</sub>  | 8.56×10 <sup>-13</sup>                                                       | 100.07                         | Heterocyclics        |
| Benzonitrile                   | C <sub>7</sub> H <sub>5</sub> N               | 3.44×10 <sup>-13</sup>                                                       | 103.12                         | Reduced Aromatics    |
| Styrene                        | C <sub>8</sub> H <sub>8</sub>                 | 5.80×10 <sup>-11</sup>                                                       | 104.15                         | Reduced Aromatics    |
| Vinylpyridine                  | C <sub>7</sub> H <sub>7</sub> N               | 2.66×10 <sup>-11</sup>                                                       | 105.14                         | Heterocyclics        |
| Benzaldehyde                   | C <sub>7</sub> H <sub>6</sub> O               | 1.20×10 <sup>-11</sup>                                                       | 106.12                         | Oxygenated Aromatics |
| C8 Aromatics                   | C <sub>8</sub> H <sub>10</sub>                | 1.32×10 <sup>-11</sup>                                                       | 106.16                         | Reduced Aromatics    |
| Benzoquinone                   | C <sub>6</sub> H <sub>4</sub> O <sub>2</sub>  | 4.51×10 <sup>-12</sup>                                                       | 108.09                         | Oxygenated Aromatics |
| Cresol                         | C <sub>7</sub> H <sub>8</sub> O               | 5.30×10 <sup>-11</sup>                                                       | 108.14                         | Oxygenated Aromatics |
| Benzenediol                    | C <sub>6</sub> H <sub>6</sub> O <sub>2</sub>  | 1.04×10 <sup>-10</sup>                                                       | 110.11                         | Oxygenated Aromatics |
| Trimethylfuran                 | C <sub>7</sub> H <sub>10</sub> O              | 1.59×10 <sup>-10</sup>                                                       | 110.15                         | Heterocyclics        |
| Dihydroxypyridine              | C <sub>5</sub> H <sub>5</sub> NO <sub>2</sub> | 4.55×10 <sup>-11</sup>                                                       | 111.10                         | Heterocyclics        |
| 5-Hydroxy 2-furfural           | C <sub>5</sub> H <sub>4</sub> O <sub>3</sub>  | 4.90×10 <sup>-11</sup>                                                       | 112.08                         | Heterocyclics        |
| Nitrofuran                     | C <sub>4</sub> H <sub>3</sub> NO <sub>3</sub> | 5.06×10 <sup>-12</sup>                                                       | 113.07                         | Heterocyclics        |
| 5-Hydroxymethyl-2[3H]-furanone | C <sub>5</sub> H <sub>6</sub> O <sub>3</sub>  | 1.00×10 <sup>-10</sup>                                                       | 114.10                         | Heterocyclics        |
| 5-Hydroxytetrahydro2-furfural  | C <sub>5</sub> H <sub>8</sub> O <sub>3</sub>  | 5.00×10 <sup>-12</sup>                                                       | 116.11                         | Heterocyclics        |
| Benzeneacetonitrile            | C <sub>8</sub> H <sub>7</sub> N               | 2.07×10 <sup>-12</sup>                                                       | 117.15                         | Reduced Aromatics    |
| Benzofuran                     | C <sub>8</sub> H <sub>6</sub> O               | 3.70×10 <sup>-11</sup>                                                       | 118.13                         | Heterocyclics        |
| Methylstyrene                  | C <sub>9</sub> H <sub>10</sub>                | 5.40×10 <sup>-11</sup>                                                       | 118.18                         | Reduced Aromatics    |
| Tolualdehyde                   | C <sub>8</sub> H <sub>8</sub> O               | 1.60×10 <sup>-11</sup>                                                       | 120.15                         | Oxygenated Aromatics |
| C9 Aromatics                   | C <sub>9</sub> H <sub>12</sub>                | 2.20×10 <sup>-11</sup>                                                       | 120.19                         | Reduced Aromatics    |
| Salicylaldehyde                | C <sub>7</sub> H <sub>6</sub> O <sub>2</sub>  | 2.80×10 <sup>-11</sup>                                                       | 122.12                         | Oxygenated Aromatics |
| Dimethylphenol                 | C <sub>8</sub> H <sub>10</sub> O              | 5.05×10 <sup>-11</sup>                                                       | 122.16                         | Oxygenated Aromatics |
| Hydroxy benzoquinone           | C <sub>6</sub> H <sub>4</sub> O <sub>3</sub>  | 1.30×10 <sup>-11</sup>                                                       | 124.09                         | Oxygenated Aromatics |
| Guaiacol                       | C <sub>7</sub> H <sub>8</sub> O <sub>2</sub>  | 7.53×10 <sup>-11</sup>                                                       | 124.14                         | Oxygenated Aromatics |
| Hydroxymethylfurfural          | C <sub>6</sub> H <sub>6</sub> O <sub>3</sub>  | 1.00×10 <sup>-10</sup>                                                       | 126.11                         | Heterocyclics        |
| Methyl benzofuran              | C <sub>9</sub> H <sub>8</sub> O               | 9.75×10 <sup>-11</sup>                                                       | 132.16                         | Heterocyclics        |
| Methyl propenyl benzene        | C <sub>10</sub> H <sub>12</sub>               | 3.30×10 <sup>-11</sup>                                                       | 132.20                         | Reduced Aromatics    |
| 3-Methylacetophenone           | C <sub>9</sub> H <sub>10</sub> O              | 2.42×10 <sup>-12</sup>                                                       | 134.17                         | Oxygenated Aromatics |

|                                                 |                                                |                        |        |                      |
|-------------------------------------------------|------------------------------------------------|------------------------|--------|----------------------|
| C10 Aromatics                                   | C <sub>10</sub> H <sub>14</sub>                | 9.50×10 <sup>-12</sup> | 134.22 | Reduced Aromatics    |
| Methylbenzoic Acid                              | C <sub>8</sub> H <sub>8</sub> O <sub>2</sub>   | 1.20×10 <sup>-11</sup> | 136.15 | Oxygenated Aromatics |
| Monoterpenes                                    | C <sub>10</sub> H <sub>16</sub>                | 1.63×10 <sup>-10</sup> | 136.23 | Biogenics            |
| Nitrotoluene                                    | C <sub>7</sub> H <sub>7</sub> NO <sub>2</sub>  | 7.72×10 <sup>-13</sup> | 137.13 | Reduced Aromatics    |
| Methylguaiacol                                  | C <sub>8</sub> H <sub>10</sub> O <sub>2</sub>  | 3.97×10 <sup>-11</sup> | 138.16 | Oxygenated Aromatics |
| Methylnaphthalene                               | C <sub>11</sub> H <sub>10</sub>                | 5.65×10 <sup>-11</sup> | 142.20 | Reduced Aromatics    |
| Product of levoglucosan dehydration (pyrolysis) | C <sub>6</sub> H <sub>8</sub> O <sub>4</sub>   | 5.28×10 <sup>-11</sup> | 144.12 | Alkanes              |
| Dimethylbenzofuran                              | C <sub>10</sub> H <sub>10</sub> O              | 1.20×10 <sup>-10</sup> | 146.18 | Heterocyclics        |
| Methylchavicol                                  | C <sub>10</sub> H <sub>12</sub> O              | 5.43×10 <sup>-11</sup> | 148.20 | Oxygenated Aromatics |
| C11 aromatics                                   | C <sub>11</sub> H <sub>16</sub>                | 5.00×10 <sup>-11</sup> | 148.24 | Reduced Aromatics    |
| Vinylguaiacol                                   | C <sub>9</sub> H <sub>10</sub> O <sub>2</sub>  | 5.44×10 <sup>-11</sup> | 150.17 | Oxygenated Aromatics |
| Vanillin                                        | C <sub>8</sub> H <sub>8</sub> O <sub>3</sub>   | 2.73×10 <sup>-11</sup> | 152.15 | Oxygenated Aromatics |
| Camphor                                         | C <sub>10</sub> H <sub>16</sub> O              | 4.30×10 <sup>-12</sup> | 152.23 | Biogenics            |
| Syringol                                        | C <sub>8</sub> H <sub>10</sub> O <sub>3</sub>  | 9.66×10 <sup>-11</sup> | 154.16 | Oxygenated Aromatics |
| Cineole                                         | C <sub>10</sub> H <sub>18</sub> O              | 2.26×10 <sup>-11</sup> | 154.25 | Biogenics            |
| 1,3-Dimethylnaphthalene                         | C <sub>12</sub> H <sub>12</sub>                | 6.94×10 <sup>-11</sup> | 156.22 | Reduced Aromatics    |
| Decanal                                         | C <sub>10</sub> H <sub>20</sub> O              | 3.45×10 <sup>-11</sup> | 156.26 | Alkanes              |
| C12 aromatics                                   | C <sub>12</sub> H <sub>18</sub>                | 1.13×10 <sup>-10</sup> | 162.27 | Reduced Aromatics    |
| Isoeugenol                                      | C <sub>10</sub> H <sub>12</sub> O <sub>2</sub> | 8.84×10 <sup>-11</sup> | 188.22 | Oxygenated Aromatics |
| C13 aromatics                                   | C <sub>13</sub> H <sub>20</sub>                | 1.13×10 <sup>-10</sup> | 176.30 | Reduced Aromatics    |
| Sesquiterpenes                                  | C <sub>15</sub> H <sub>24</sub>                | 3.00×10 <sup>-10</sup> | 204.35 | Biogenics            |
| 5-MethylFurfural                                | C <sub>6</sub> H <sub>6</sub> O <sub>2</sub>   | 5.18×10 <sup>-11</sup> | 110.11 | Heterocyclics        |

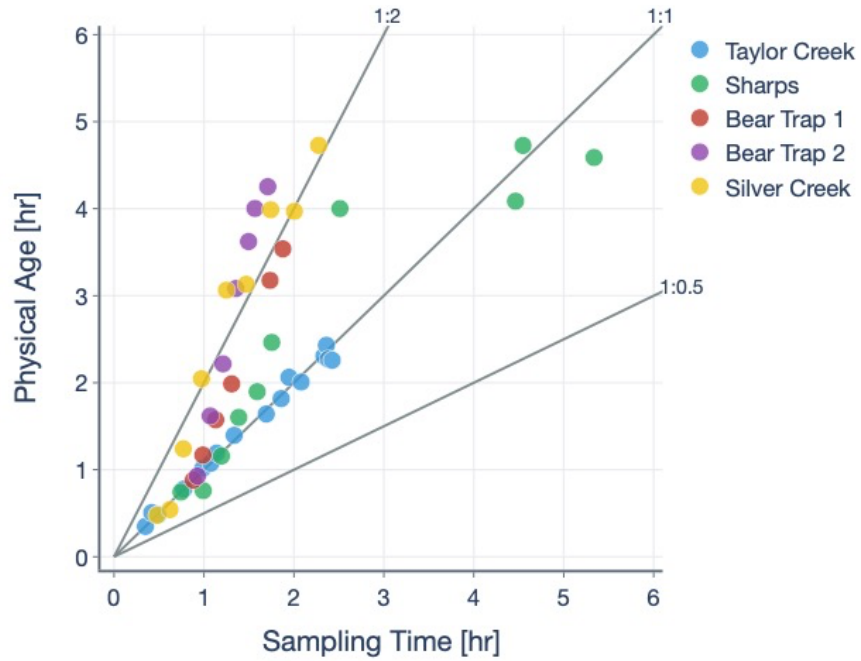

*Figure S1: Physical age plotted against the sampling time for the five transect sets and four wildfire plumes. Physical age was calculated by dividing the straight-line distance from the fire with the average wind speed measured within a transect. Sampling time was calculated as the time of the day minus the time when the first transect was sampled but offset by the physical age at the first transect.*

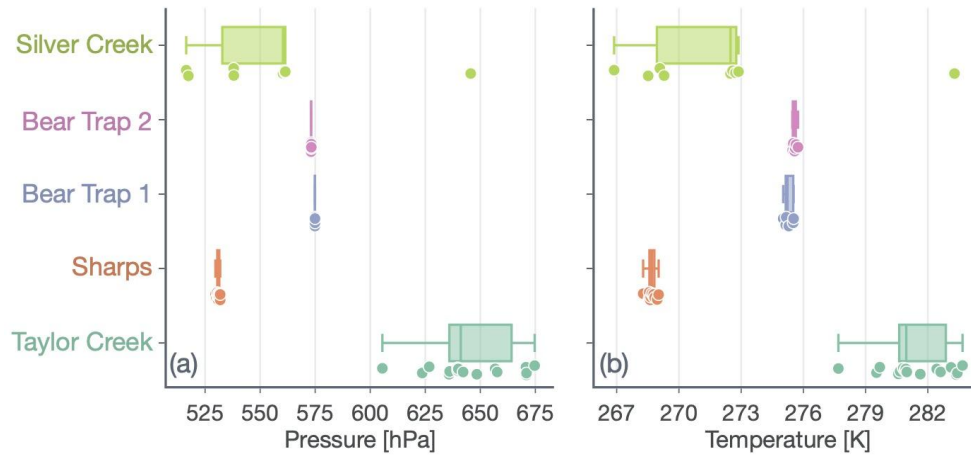

| Wildfire     | Average Pressure [hPa] | Average Temperature [K] |
|--------------|------------------------|-------------------------|
| Taylor Creek | 646                    | 281.4                   |
| Sharps       | 531                    | 268.7                   |
| Bear Trap 1  | 575                    | 275.3                   |
| Bear Trap2   | 573                    | 275.6                   |
| Silver Creek | 555                    | 272.0                   |

*Figure S2: Box plots for (a) pressures and (b) temperatures encountered during the pseudo-Lagrangian evolution of smoke in the five transect sets and four wildfire plumes.*

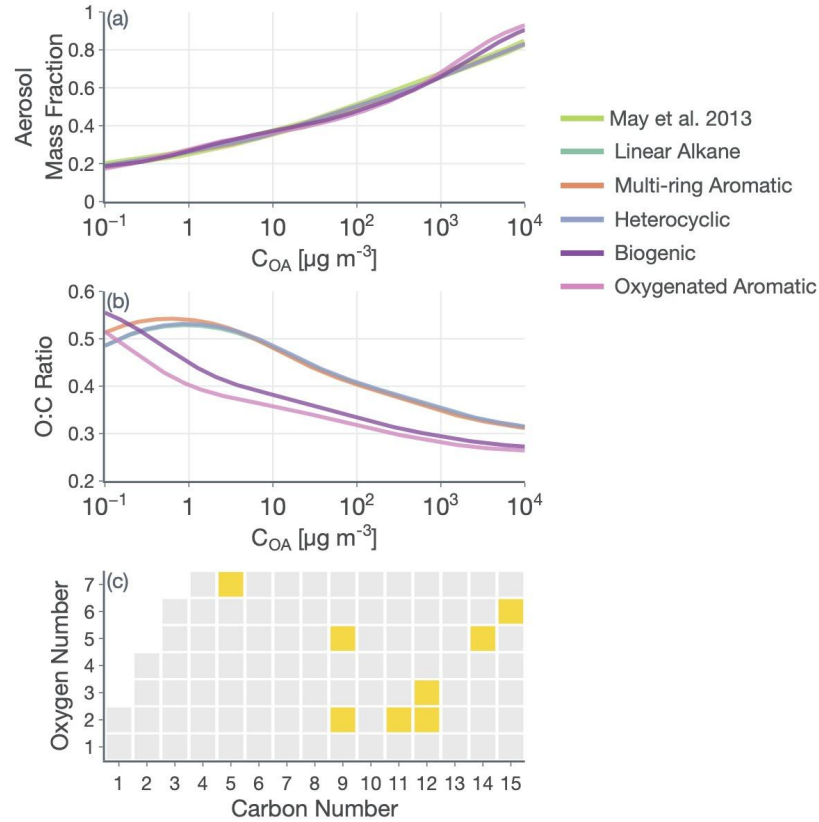

Figure S3: (a) POA volatility from May et al. (2013) and that used in this work expressed as the aerosol mass fraction against the OA mass concentration. The POA volatility based on the use of multi-ring aromatics was used with the base configuration of the SOM-TOMAS model while the POA volatility based on the use of other organic classes was used to perform sensitivity simulations. (b) Dependence of the OA O:C ratio as a function of the OA mass concentration. (c) Model species, shown in yellow, in the SOM grid used to represent the POA and SVOC mass. This distribution was informed based on the Monte-Carlo simulations performed and discussed in Section 3.2 in the main paper.

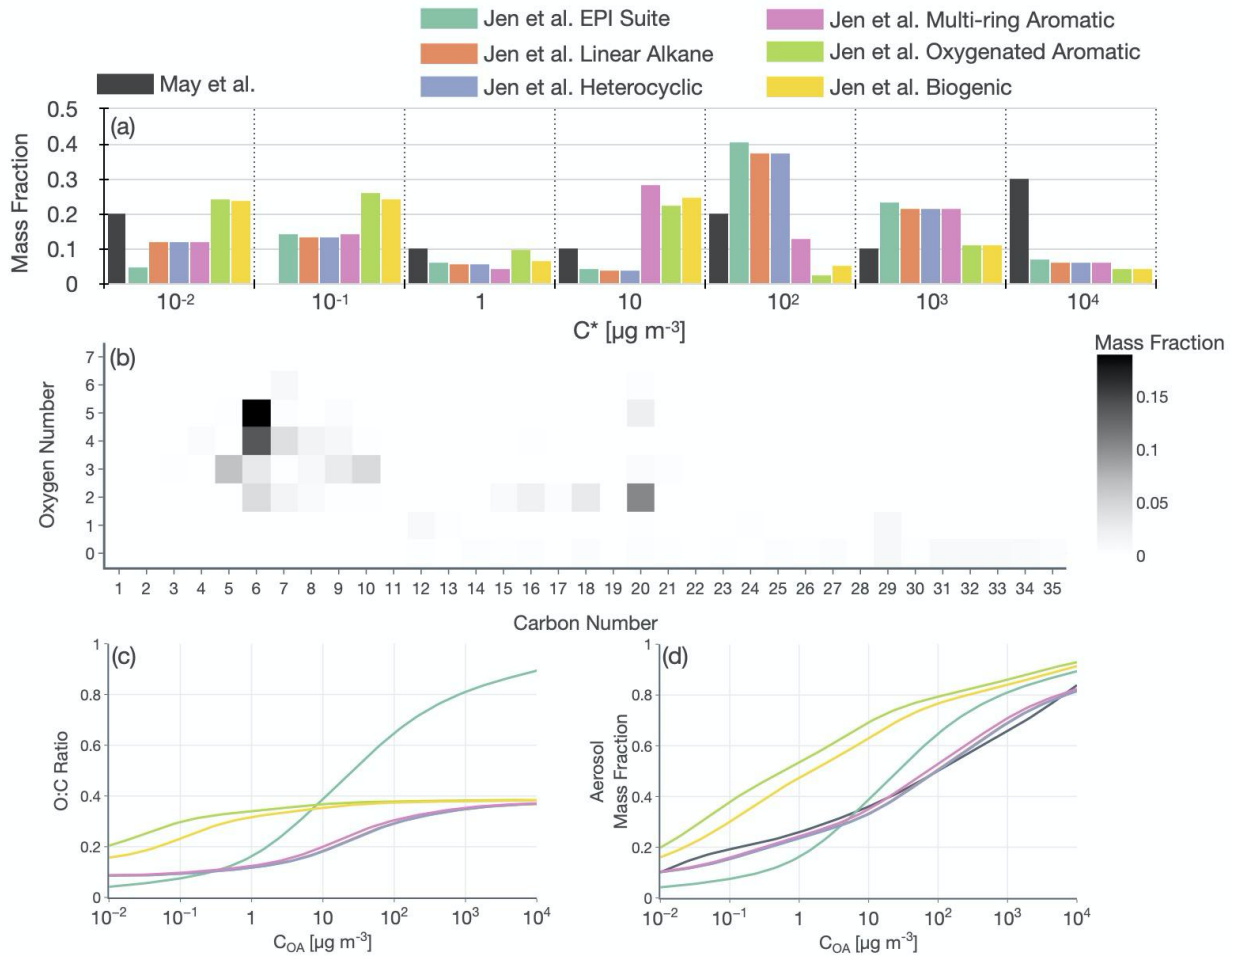

Figure S4: Averaged and normalized, (a) volatility distribution and (b) mass distribution in carbon-oxygen space for the POA and SVOC emissions quantified by Jen et al. (2019). Volatility distribution from May et al. (2014) is also presented in panel (a). POA (c) O:C ratio and (d) aerosol mass fraction as a function of the OA mass concentration. Jen et al. (2019) only quantified 10 to 65% of the POA and SVOC mass collected on quartz filters. The volatility ( $c^*$ ) was calculated for the POA and SVOC species either using EPISuite v4.11 (EPA, 2021) or the Statistical Oxidation Model (SOM) (Cappa and Wilson, 2012; Jathar et al., 2015).

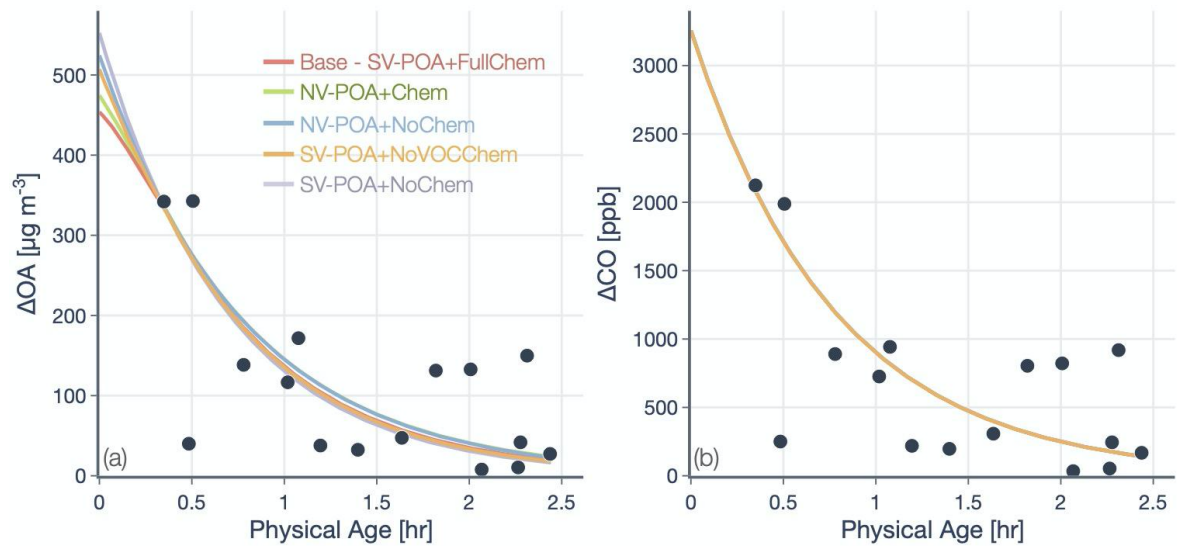

Figure S5: Predictions of the (a) OA and (b) CO concentrations from the SOM-TOMAS model (solid-colored lines) compared against measurements (solid black circles) from the Taylor Creek Fire. Model predictions are shown for five different simulations that vary in their assumptions about POA volatility and oxidation chemistry.



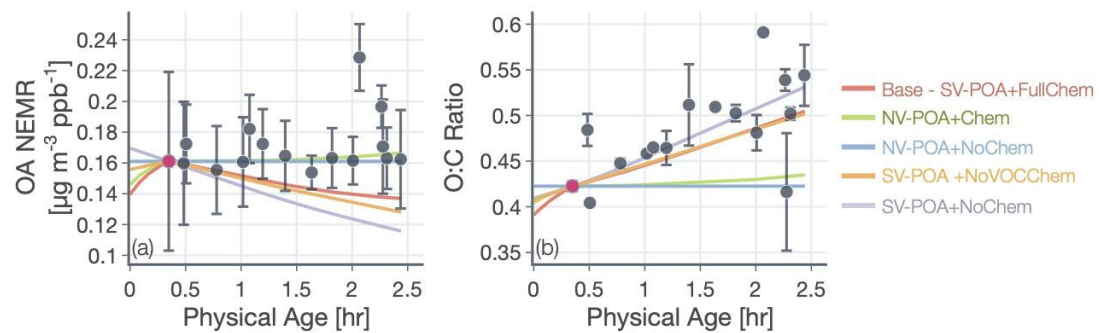

Figure S6: Same as Figure 4 but with the standard error in the mean for the observations.

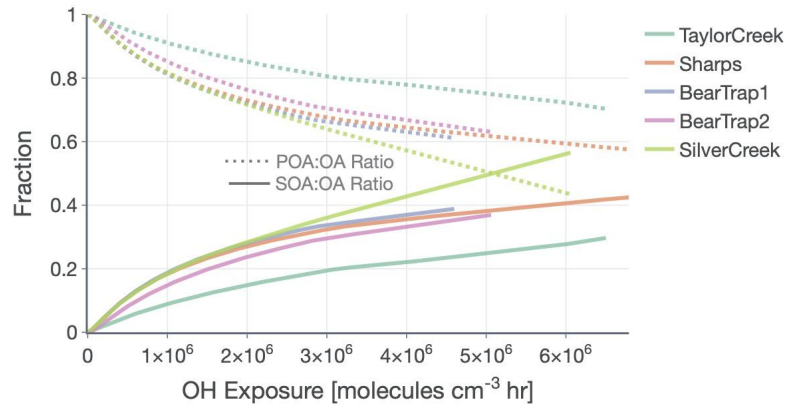

Figure S7: Predicted POA (dotted lines) and SOA (solid lines) ratios with OA for the base simulation results presented in Figures 4 and 5.

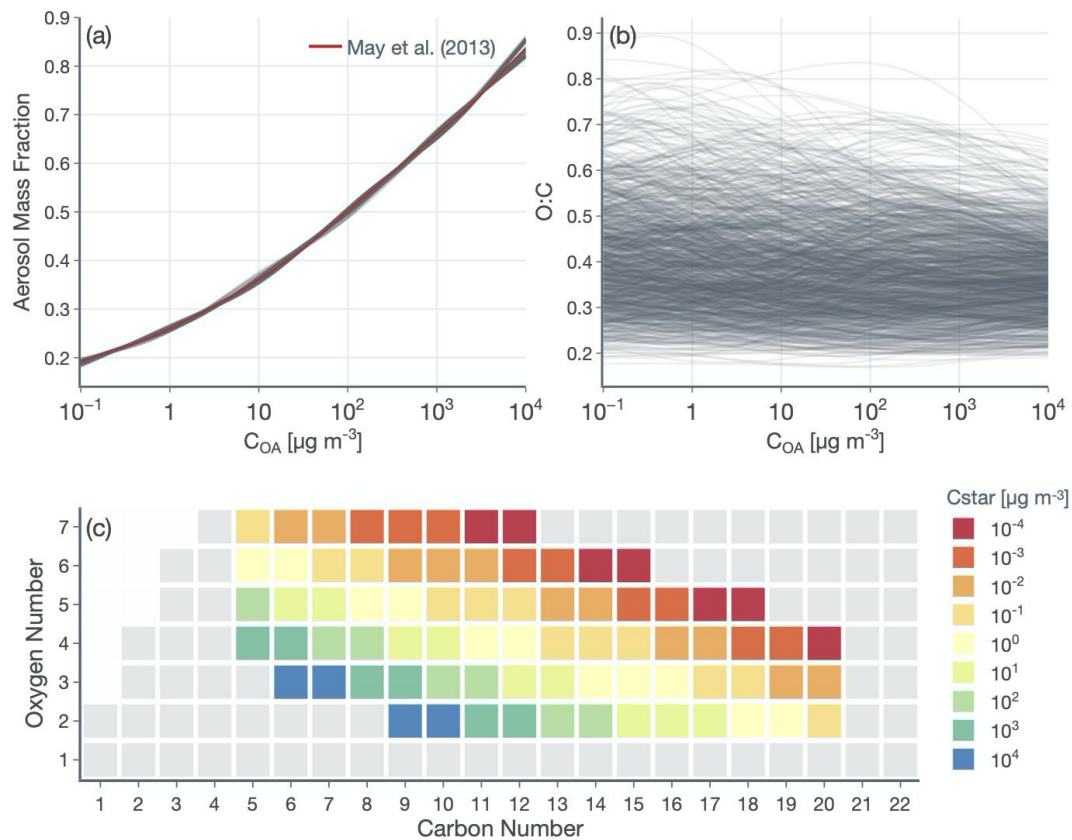

Figure S8: (a) POA volatility from May et al. (2013) and that based on 1000 Monte Carlo simulations. (b) OA O:C ratio as a function of the OA mass concentration for all 1000 Monte Carlo simulations. (c) SOM model species, shown in color, considered as options to represent the POA+SVOC mass.

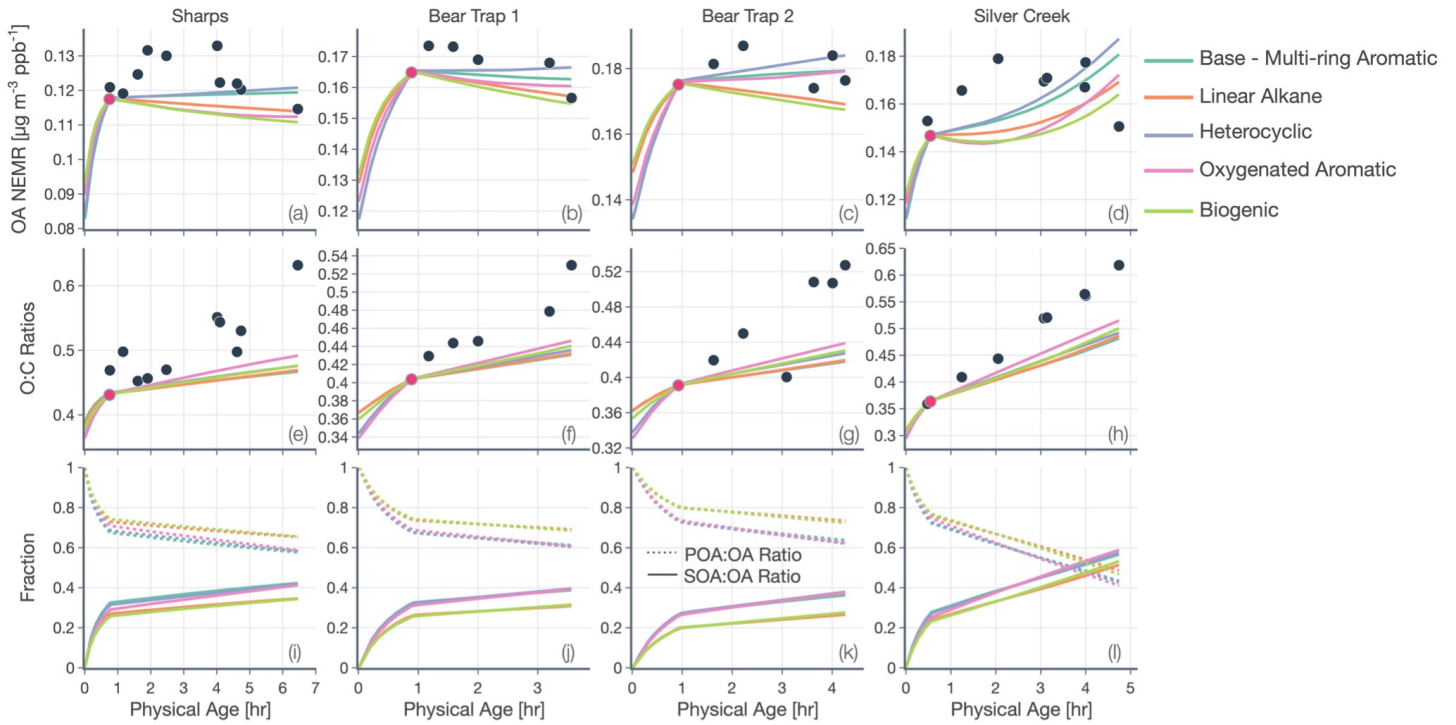

Figure S9: Predictions of (a,b,c,d) OA NEMR and (e,f,g,h) OA O:C from the SOM-TOMAS model (solid colored lines) compared against measurements (solid black circles) from the four different transect sets. (i,j,k,l) Predictions of the fractional contributions of POA and SOA to OA. Model predictions are shown for sensitivity simulations performed with varying assumptions for the SVOC oxidation chemistry.

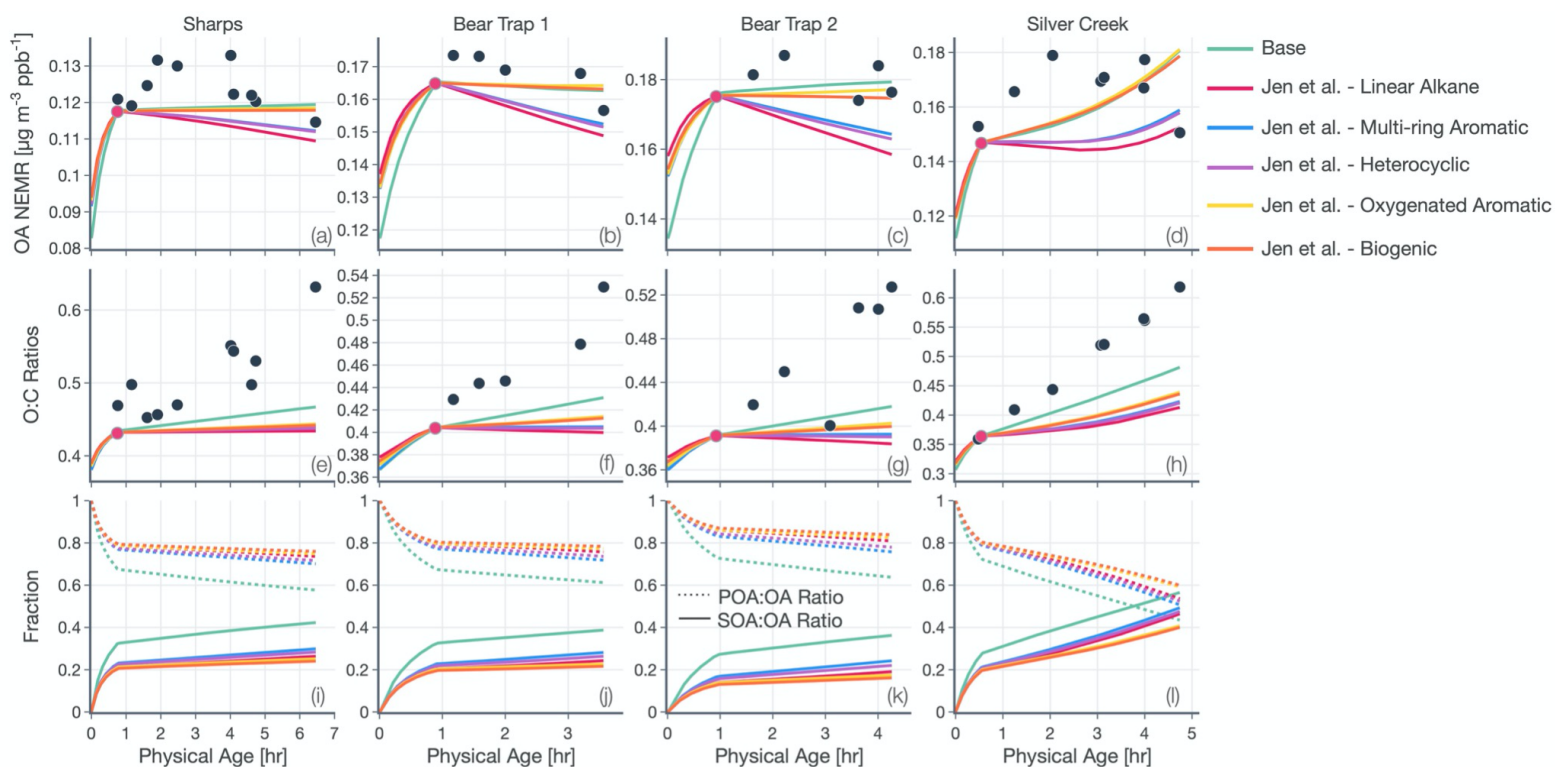

*Figure S10: Predictions of (a,b,c,d) OA NEMR and (e,f,g,h) OA O:C from the SOM-TOMAS model (solid colored lines) compared against measurements (solid black circles) from the four different transect sets. (i,j,k,l) Predictions of the fractional contributions of POA and SOA to OA. Model predictions are shown for sensitivity simulations performed with varying assumptions for the POA volatility and SVOC oxidation chemistry.*

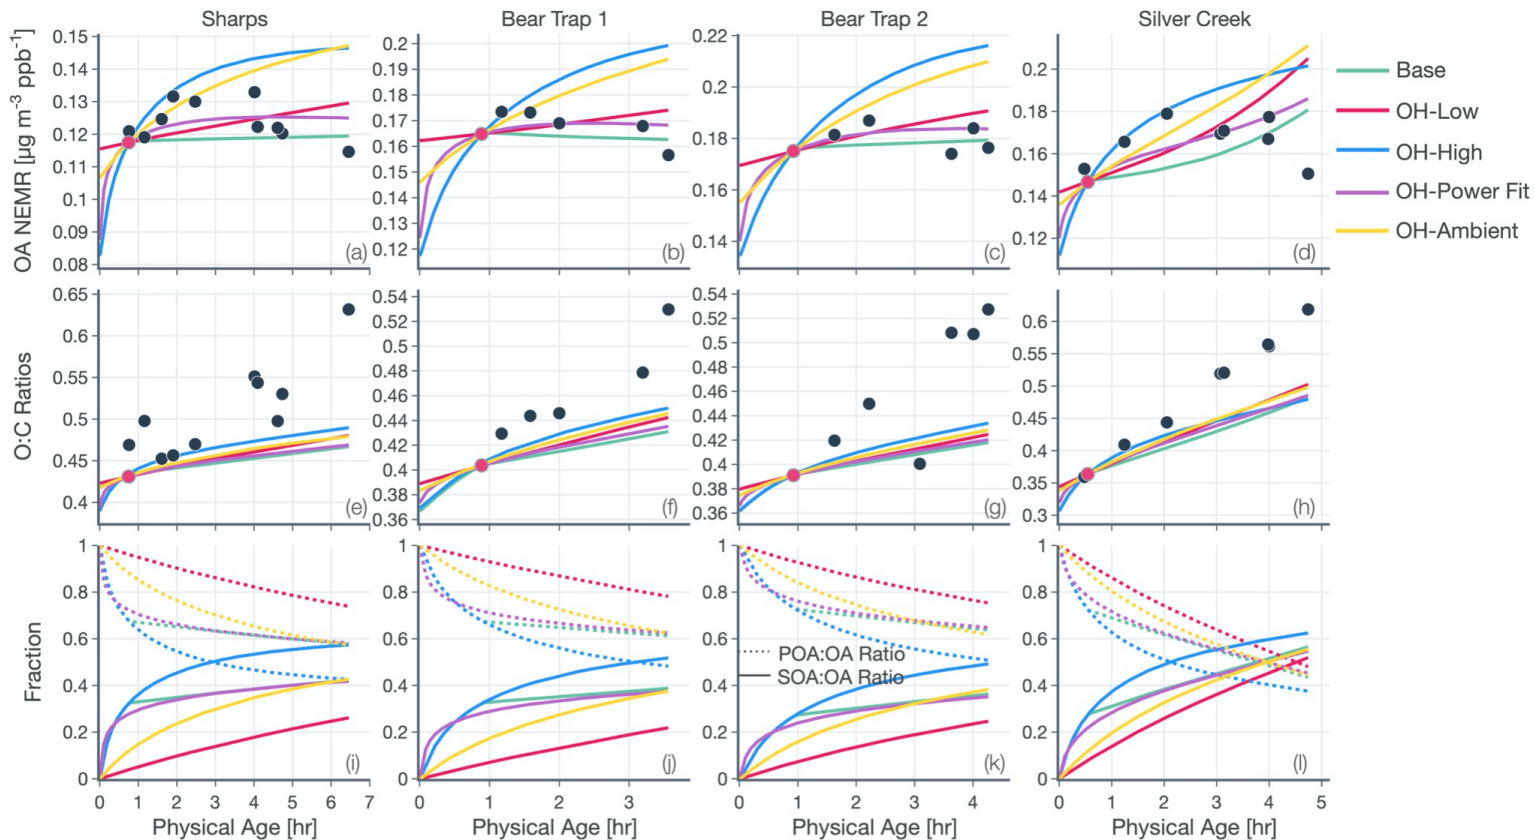

Figure S11: Predictions of (a,b,c,d) OA NEMR and (e,f,g,h) OA O:C from the SOM-TOMAS model (solid colored lines) compared against measurements (solid black circles) from the four different transect sets. (i,j,k,l) Predictions of the fractional contributions of POA and SOA to OA. Model predictions are shown for sensitivity simulations performed with varying assumptions for OH.

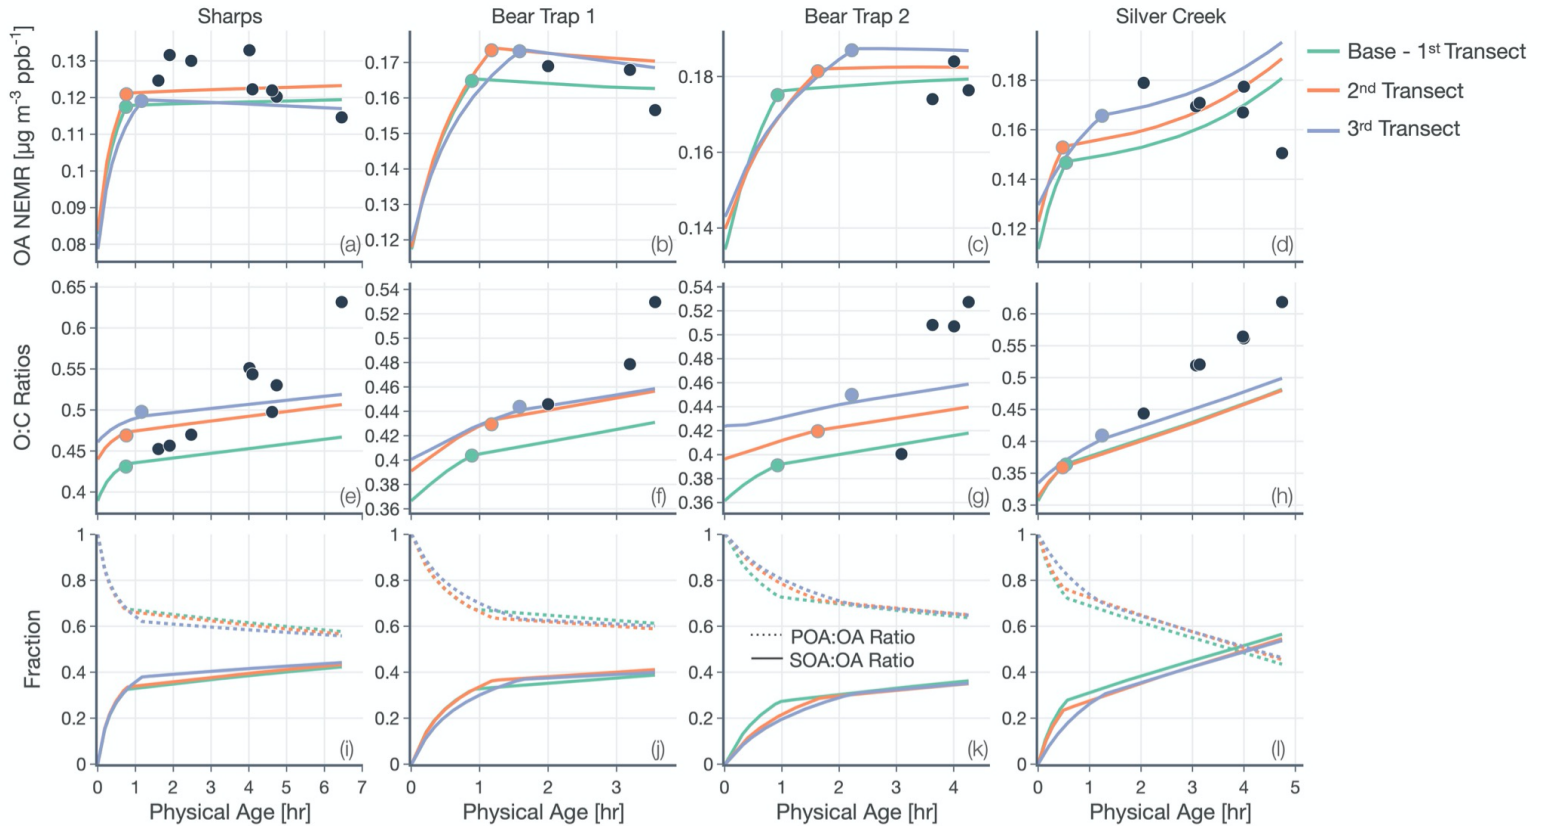

Figure S12: Predictions of (a,b,c,d) OA NEMR and (e,f,g,h) OA O:C from the SOM-TOMAS model (solid colored lines) compared against measurements (solid black circles) from the four different transect sets. (i,j,k,l) Predictions of the fractional contributions of POA and SOA to OA. Model predictions are shown for sensitivity simulations performed by varying the 'first transect'.



## References

- Cappa, C. D. and Wilson, K. R.: Multi-generation gas-phase oxidation, equilibrium partitioning, and the formation and evolution of secondary organic aerosol, *Atmos. Chem. Phys.*, 12(20), 9505–9528, doi:10.5194/acp-12-9505-2012, 2012.
- Chhabra, P. S., Ng, N. L., Canagaratna, M. R., Corrigan, A. L., Russell, L. M., Worsnop, D. R., Flagan, R. C. and Seinfeld, J. H.: Elemental composition and oxidation of chamber organic aerosol, *Atmos. Chem. Phys.*, 11(17), 8827–8845, doi:10.5194/acp-11-8827-2011, 2011.
- EPA: EPI Suite<sup>TM</sup>-estimation program interface, [online] Available from: <https://www.epa.gov/tsca-screening-tools/epi-suite-estimation-program-interface> (Accessed 20 March 2021), 2021.
- He, Y., King, B., Pothier, M., Lewane, L., Akherati, A., Mattila, J., Farmer, D. K., McCormick, R. L., Thornton, M., Pierce, J. R., Volckens, J. and Jathar, S. H.: Secondary organic aerosol formation from evaporated biofuels: comparison to gasoline and correction for vapor wall losses, *Environ. Sci. Process. Impacts*, In press, doi:10.1039/d0em00103a, 2020.
- Jathar, S. H., Cappa, C. D., Wexler, A. S., Seinfeld, J. H. and Kleeman, M. J.: Multi-generational oxidation model to simulate secondary organic aerosol in a 3-D air quality model, *Geoscientific Model Development*; Katlenburg-Lindau, 8(8), 2553–2567, doi:10.5194/gmd-8-2553-2015, 2015.
- Jen, C. N., Hatch, L. E., Selimovic, V., Yokelson, R. J., Weber, R., Fernandez, A. E., Kreisberg, N. M., Barsanti, K. C. and Goldstein, A. H.: Speciated and total emission factors of particulate organics from burning western US wildland fuels and their dependence on combustion efficiency, *Atmos. Chem. Phys.*, 19(2), 1013–1026, doi:10.5194/acp-19-1013-2019, 2019.
- Loza, C. L., Craven, J. S., Yee, L. D., Coggon, M. M., Schwantes, R. H., Shiraiwa, M., Zhang, X., Schilling, K. A., Ng, N. L., Canagaratna, M. R., Ziemann, P. J., Flagan, R. C. and Seinfeld, J. H.: Secondary organic aerosol yields of 12-carbon alkanes, *Atmos. Chem. Phys.*, 14(3), 1423–1439, doi:10.5194/acp-14-1423-2014, 2014.
- May, A. A., Levin, E. J. T., Hennigan, C. J., Riipinen, I., Lee, T., Collett, J. L., Jimenez, J. L., Kreidenweis, S. M. and Robinson, A. L.: Gas-particle partitioning of primary organic aerosol emissions: 3. Biomass burning, *J. Geophys. Res. D: Atmos.*, 118(19) [online] Available from: <http://onlinelibrary.wiley.com/doi/10.1002/jgrd.50828/full>, 2013.
- Ng, N. L., Kroll, J. H., Chan, A. W. H., Chhabra, P. S., Flagan, R. C. and Seinfeld, J. H.: Secondary organic aerosol formation from *m*-xylene, toluene, and benzene, *Atmos. Chem. Phys.*, 7(14), 3909–3922, doi:10.5194/acp-7-3909-2007, 2007.
- Yee, L. D., Kautzman, K. E., Loza, C. L., Schilling, K. A., Coggon, M. M., Chhabra, P. S., Chan, M. N., Chan, A. W. H., Hersey, S. P., Crounse, J. D., Wennberg, P. O., Flagan, R. C. and Seinfeld, J. H.: Secondary organic aerosol formation from biomass burning intermediates: phenol and methoxyphenols, *Atmos. Chem. Phys.*, 13(16), 8019–8043, doi:10.5194/acp-13-8019-2013, 2013.
- Zhang, X., Cappa, C. D., Jathar, S. H., McVay, R. C., Ensberg, J. J., Kleeman, M. J. and Seinfeld, J. H.: Influence of vapor wall loss in laboratory chambers on yields of secondary organic aerosol, *Proc. Natl. Acad. Sci. U. S. A.*, 111(16), 5802–5807, doi:10.1073/pnas.1404727111, 2014.
